# Supplementary material for: New insights into the mesophase transformation of ethane-bridged PMOs by the influence of different counterions under basic conditions
Source: Royal Society of Chemistry journal article supplement (doi:10.1039/c4ra15849k), 2014-12-11
Supplement: c4ra15849k1.pdf [file c4ra15849k1.pdf]

## Supporting information

### **New insights into the mesophase transformation of ethane-bridged PMOs by the influence of different counterions under basic conditions**

Feng Lin,<sup>1,2</sup> Xiangyan Meng,<sup>1</sup> Elena Kukueva,<sup>3</sup> Myrjam Mertens,<sup>4</sup> Sabine Van Doorslaer,<sup>2</sup> Sara Bals,<sup>3</sup> and Pegie Cool<sup>1\*</sup>

1. Laboratory of Adsorption and Catalysis, Department of Chemistry, University of Antwerp, Universiteitsplein 1, B-2610, Wilrijk, Belgium.

2. Laboratory for Spectroscopy in Biophysics and Catalysis, Department of Physics, University of Antwerp, Universiteitsplein 1, B-2610, Wilrijk, Belgium.

3. EMAT, Department of Physics, University of Antwerp, Groenenborgerlaan 171, B-2020 Antwerp, Belgium

4. Flemish Institute for Technological Research, VITO, Boerentang 200, B-2400, Mol, Belgium

#### **Corresponding Author**

\* Fax: +32 3 2652374; Tel: : +32 3 2652355; E-mail: [pegie.cool@uantwerpen.be](mailto:pegie.cool@uantwerpen.be)

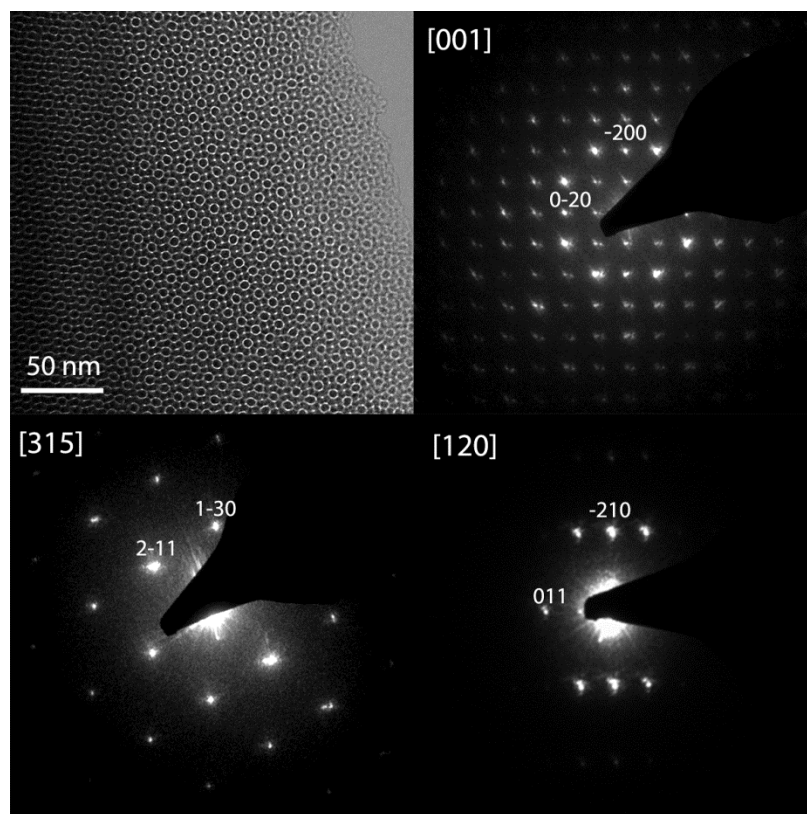

Figure S1. PMO synthesized with CTACl (cubic structure,  $Pm\bar{3}n$ ): HRTEM image acquired along the [001] direction and different diffraction patterns acquired along the indicated zone axes

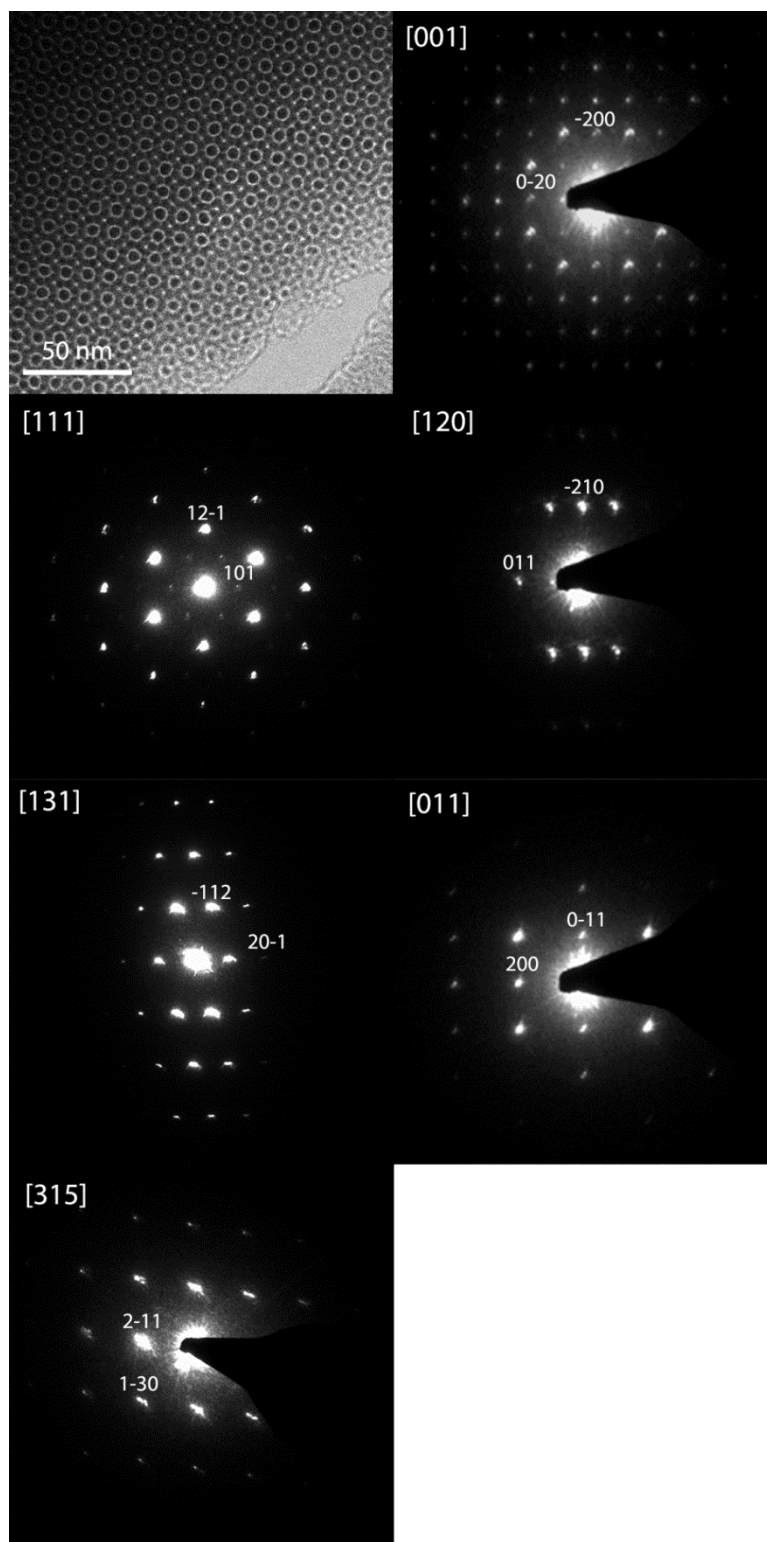

Figure S2. PMO synthesized with  $\text{CTA}(\text{SO}_4)_{1/2}$ , (cubic structure,  $Pm\bar{3}n$ ): HRTEM image acquired along the  $[001]$  direction and different diffraction patterns acquired along the indicated zone axes

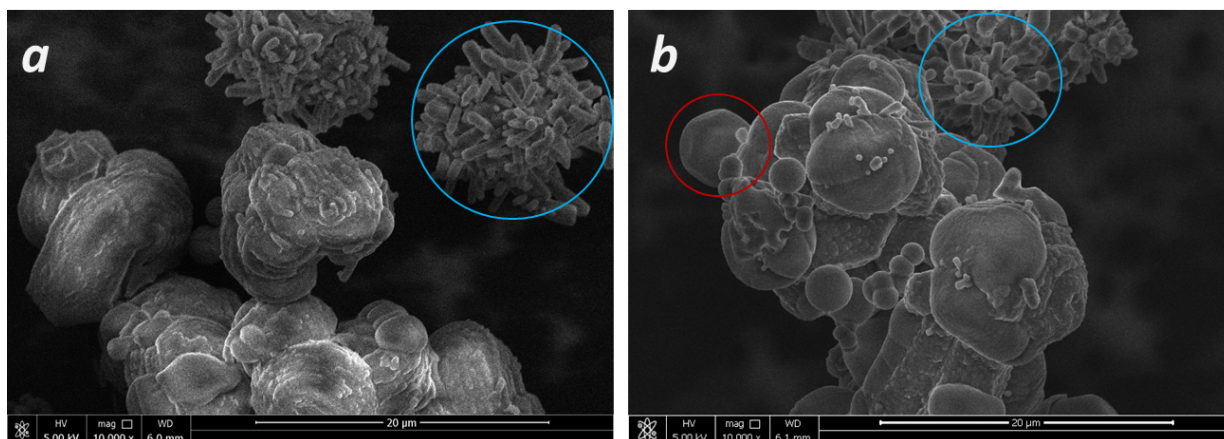

Figure S3. SEM images of ethane-bridged PMOs synthesized with a surfactant mixture CTABr/CTACl with different molar ratios: (a) CTACl:CTABr=4:6 and (b) CTACl:CTABr=6:4 (The blue circles point out the particles with 2-D hexagonal  $p6mm$  mesophase, while the red circle point out the particles with cubic  $Pm3n$  mesophase)

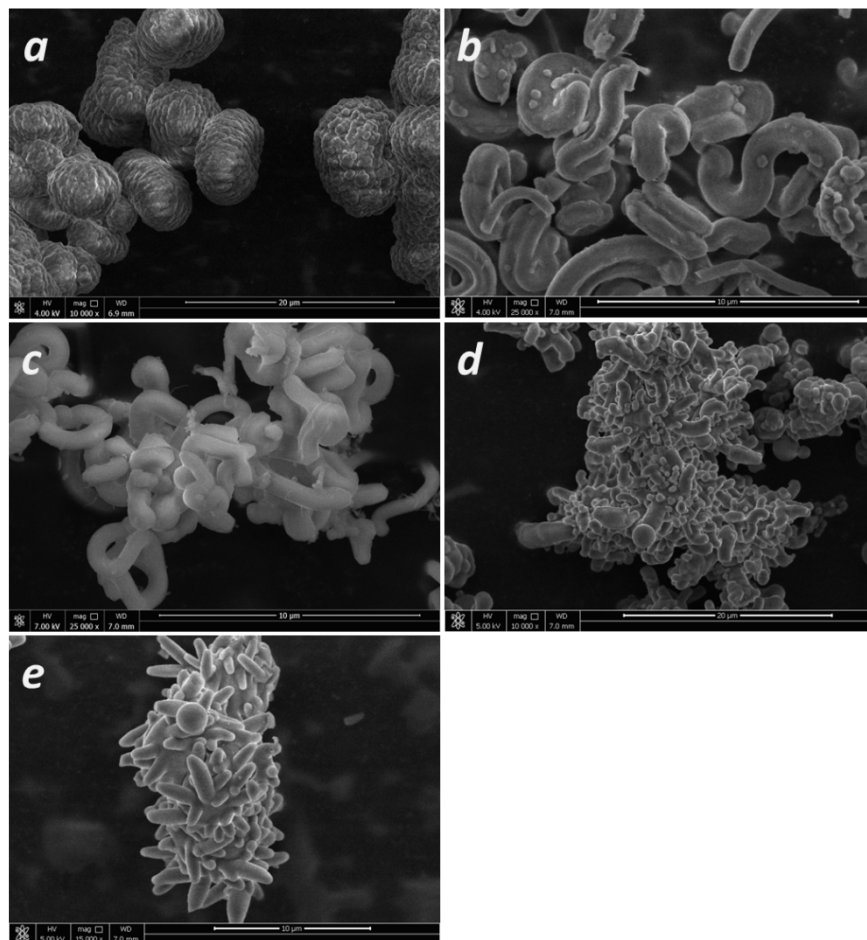

Figure S4. SEM images of the ethane-bridged PMOs synthesized with the assistance of different sodium salts in the presence of CTACl or CTABr as surfactant: (a) CTACl + NaNO<sub>3</sub>, (b) CTABr + NaSCN, (c) CTACl + NaSCN, (d) CTACl + NaCl, and (e) CTABr + NaCl

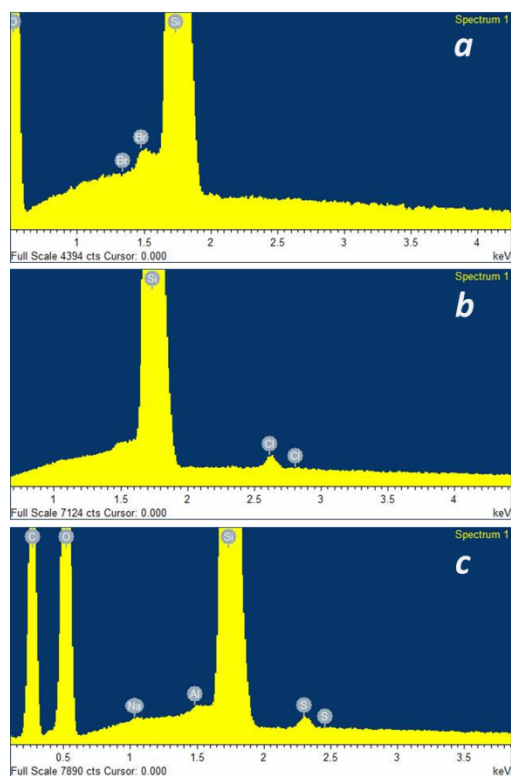

Figure S5 EDX analysis of the as-synthesized ethane-bridged PMO materials prepared with different surfactant: (a) CTABr, (b) CTACl, and (c) CTA(SO<sub>4</sub>)<sub>1/2</sub>

Table S1 The content of the counterions in as-synthesized ethane-bridged PMO materials

| Weight      | PMO-CTABr | PMO-CTACl | PMO-CTA(SO <sub>4</sub> ) <sub>1/2</sub> |
|-------------|-----------|-----------|------------------------------------------|
| X (Br/Cl/S) | 0.53%     | 1.10%     | 1.10%                                    |
